# Supplementary material for: New Diketopiperazines from a Marine-Derived Fungus Strain Aspergillus versicolor MF180151
Source: PubMed Central journal article supplement (PMC6562876; doi:10.3390/md17050262), 2019-05-02
Supplement: marinedrugs-17-00262-s001.pdf [file marinedrugs-17-00262-s001.pdf]

## *Supplementary Information*

# **New diketopiperazines from a marine-derived fungus strain *Aspergillus versicolor* MF180151**

**Jiansen Hu<sup>1,2</sup>, Zheng Li<sup>1,2</sup>, Jieyu Gao<sup>1,3</sup>, Hongtao He<sup>1,2</sup>, Huanqin Dai<sup>1</sup>, Xuekui Xia<sup>4</sup>, Cuihua Liu<sup>1\*</sup>, Lixin Zhang<sup>5\*</sup> and Fuhang Song<sup>1\*</sup>**

<sup>1</sup> CAS Key Laboratory of Pathogenic Microbiology and Immunology, Institute of Microbiology, Chinese Academy of Sciences, Beijing, 100101, China; huzxcv10@126.com (J.H.); bluewave2015@sina.com (Z.L.); hehongtao2010@live.cn (H.H.); huanqindai@gmail.com (H.D.);

<sup>2</sup> University of Chinese Academy of Sciences, Beijing, 100049, China;

<sup>3</sup> School of Food and Biological Engineering, Hefei University of Technology, Hefei, 230009, China; jieyu\_gao@163.com (J.G.);

<sup>4</sup> Key Biosensor Laboratory of Shandong Province, Biology Institute, Qilu University of Technology (Shandong Academy of Sciences), Jinan, 250013, China; xiakx@sdas.org (X.X.);

<sup>5</sup> State Key Laboratory of Bioreactor Engineering, East China University of Science and Technology, Shanghai, 200237, China;

\* Correspondence: liucuihua@im.ac.cn (C.L.); lxzhang@ecust.edu.cn (L.Z.); songfuhang@im.ac.cn (F.S.)  
Tel.: +86 10 64806197 (C.L.); +86 21 64252575 (L.Z.); +86 10 64806058 (F.S.)

## List of Supporting Information

|                                                                                                                              |    |
|------------------------------------------------------------------------------------------------------------------------------|----|
| Figure S1. <sup>1</sup> H NMR Spectrum of compounds (±)- <b>1</b> in DMSO- <i>d</i> <sub>6</sub> at 600 MHz.....             | 3  |
| Figure S2. <sup>13</sup> C NMR Spectrum of compounds (±)- <b>1</b> in DMSO- <i>d</i> <sub>6</sub> at 600 MHz.....            | 4  |
| Figure S3. HSQC NMR Spectrum of compounds (±)- <b>1</b> in DMSO- <i>d</i> <sub>6</sub> .....                                 | 5  |
| Figure S4. HMBC NMR Spectrum of compounds (±)- <b>1</b> in DMSO- <i>d</i> <sub>6</sub> .....                                 | 6  |
| Figure S5. <sup>1</sup> H- <sup>1</sup> H COSY NMR Spectrum of compounds (±)- <b>1</b> in DMSO- <i>d</i> <sub>6</sub> .....  | 7  |
| Figure S6. ROESY NMR Spectrum of compounds (±)- <b>1</b> in DMSO- <i>d</i> <sub>6</sub> .....                                | 8  |
| Figure S7. HRESIMS and UV spectrum of compounds (±)- <b>1</b> in CH <sub>3</sub> OH.....                                     | 9  |
| Figure S8. Circular Dichroism spectrum of compounds (±)- <b>1</b> in CH <sub>3</sub> OH .....                                | 10 |
| Figure S9. <sup>1</sup> H NMR Spectrum of compounds (±)- <b>2</b> in DMSO- <i>d</i> <sub>6</sub> at 600 MHz.....             | 11 |
| Figure S10. <sup>13</sup> C NMR Spectrum of compounds (±)- <b>2</b> in DMSO- <i>d</i> <sub>6</sub> at 600 MHz.....           | 12 |
| Figure S11. HSQC NMR Spectrum of compounds (±)- <b>2</b> in DMSO- <i>d</i> <sub>6</sub> at 600 MHz ..                        | 13 |
| Figure S12. HMBC NMR Spectrum of compounds (±)- <b>2</b> in DMSO- <i>d</i> <sub>6</sub> at 600 MHz .                         | 14 |
| Figure S13. <sup>1</sup> H- <sup>1</sup> H COSY NMR Spectrum of compounds (±)- <b>2</b> in DMSO- <i>d</i> <sub>6</sub> ..... | 15 |
| Figure S14. ROESY NMR Spectrum of compounds (±)- <b>2</b> in DMSO- <i>d</i> <sub>6</sub> .....                               | 16 |
| Figure S15. HRESIMS and UV spectrum of compounds (±)- <b>2</b> in CH <sub>3</sub> OH.....                                    | 17 |
| Figure S16. Circular Dichroism spectrum of compounds (±)- <b>2</b> in CH <sub>3</sub> OH .....                               | 18 |
| Figure S17. <sup>1</sup> H NMR Spectrum of compounds (±)- <b>3</b> in DMSO- <i>d</i> <sub>6</sub> at 600 MHz.....            | 19 |
| Figure S18. <sup>13</sup> C NMR Spectrum of compounds (±)- <b>3</b> in DMSO- <i>d</i> <sub>6</sub> at 600 MHz.....           | 20 |
| Figure S19. HSQC NMR Spectrum of compounds (±)- <b>3</b> in DMSO- <i>d</i> <sub>6</sub> .....                                | 21 |
| Figure S20. HMBC NMR Spectrum of compounds (±)- <b>3</b> in DMSO- <i>d</i> <sub>6</sub> .....                                | 22 |
| Figure S21. <sup>1</sup> H- <sup>1</sup> H COSY NMR Spectrum of compounds (±)- <b>3</b> in DMSO- <i>d</i> <sub>6</sub> ..... | 23 |
| Figure S22. ROESY NMR Spectrum of compounds (±)- <b>3</b> in DMSO- <i>d</i> <sub>6</sub> .....                               | 24 |
| Figure S23. HRESIMS and UV spectrum of compounds (±)- <b>3</b> in CH <sub>3</sub> OH.....                                    | 25 |
| Figure S24. Circular Dichroism spectrum of compounds (±)- <b>3</b> in CH <sub>3</sub> OH .....                               | 26 |

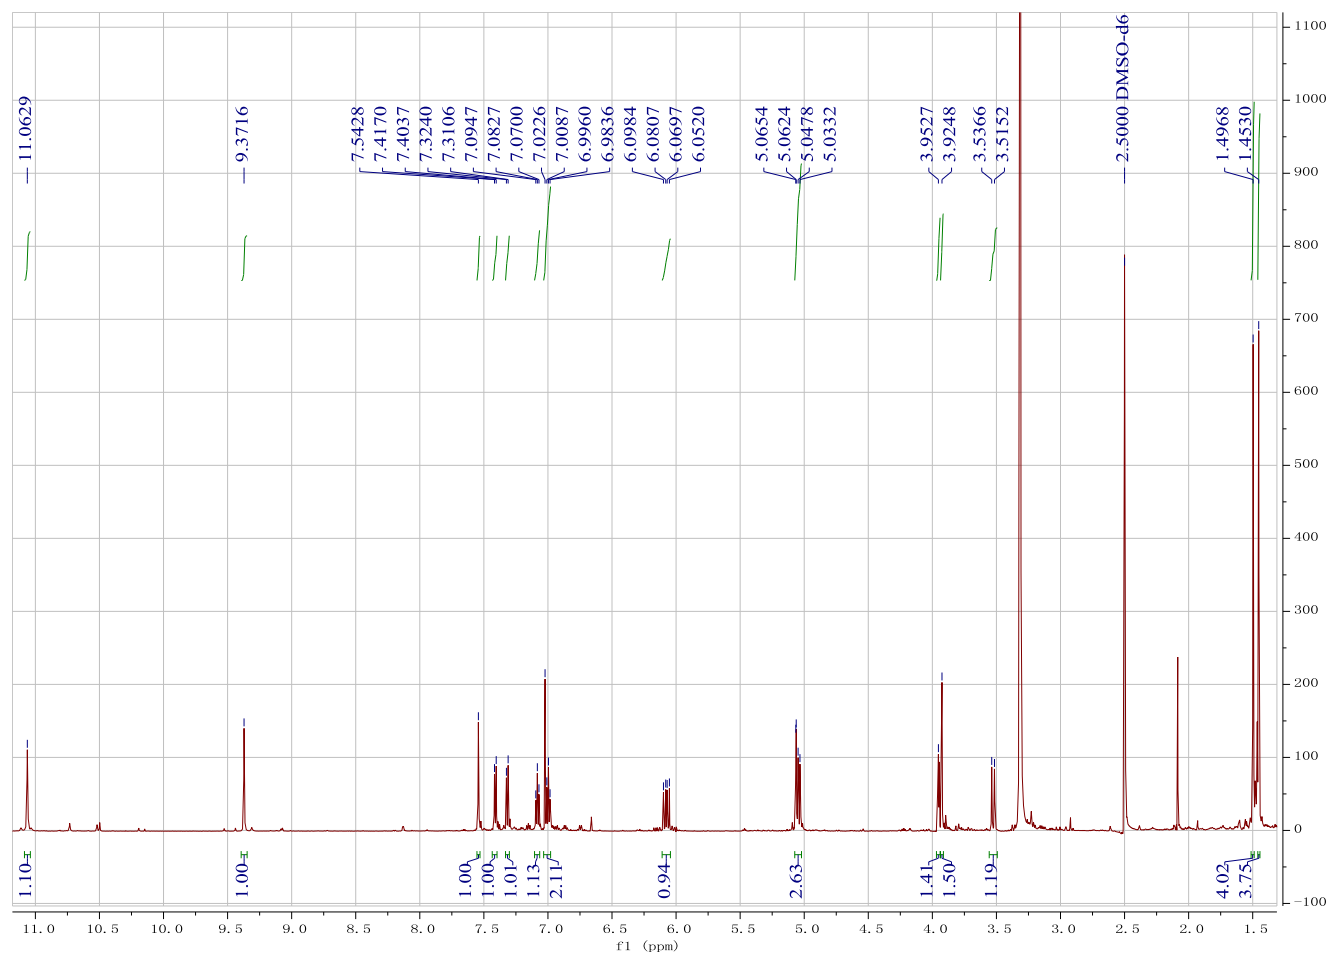

**Figure S1.**  $^1\text{H}$  NMR Spectrum of compounds ( $\pm$ )-**1** in  $\text{DMSO-}d_6$  at 600 MHz

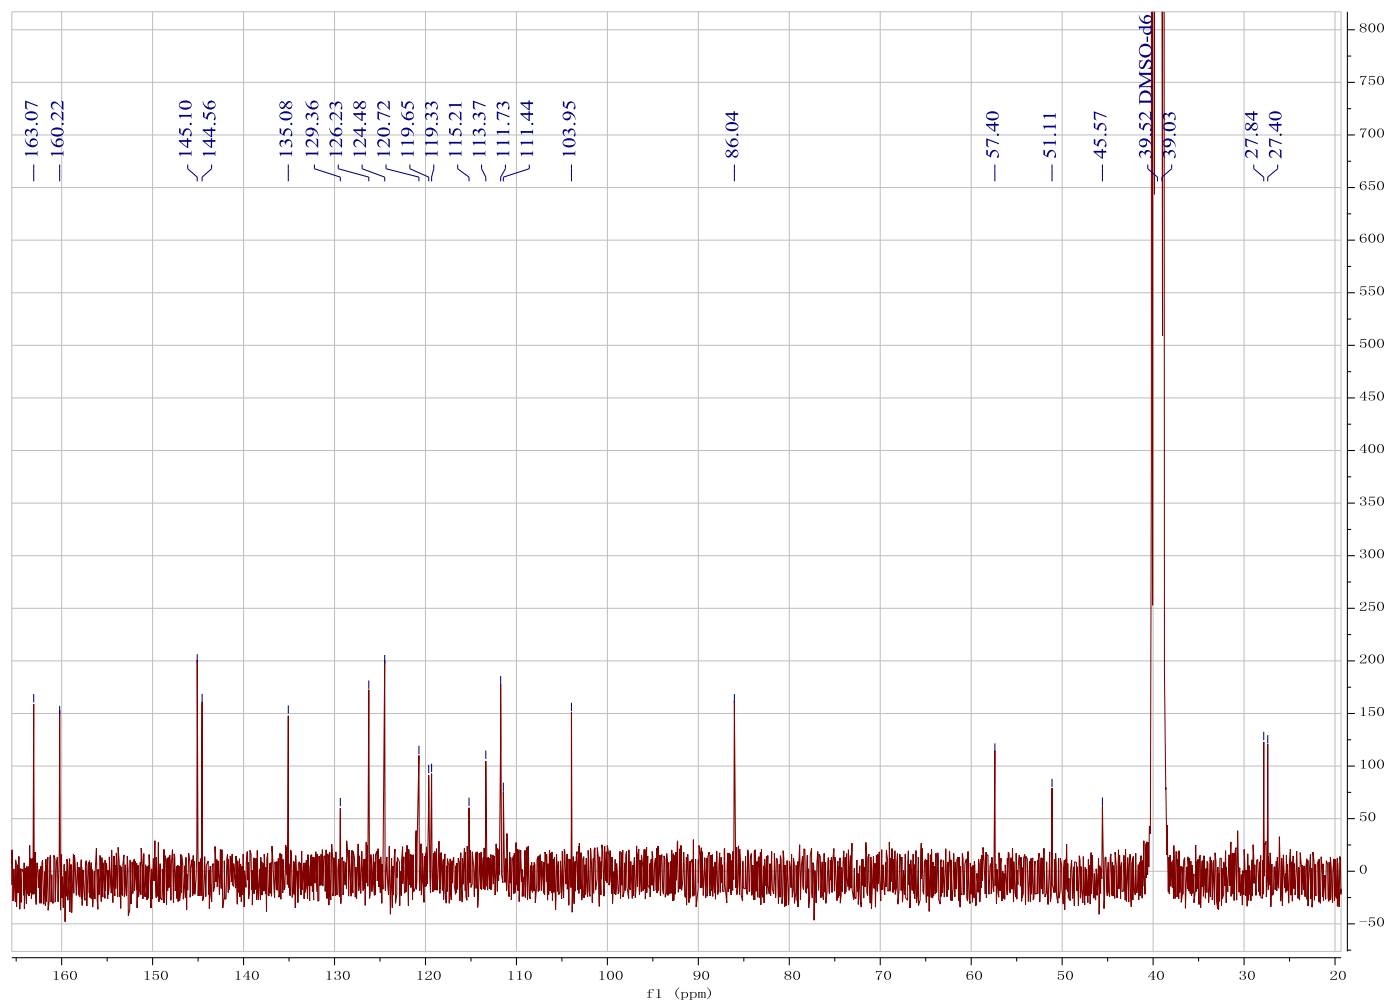

**Figure S2.**  $^{13}\text{C}$  NMR Spectrum of compounds ( $\pm$ )-**1** in  $\text{DMSO-}d_6$  at 600 MHz

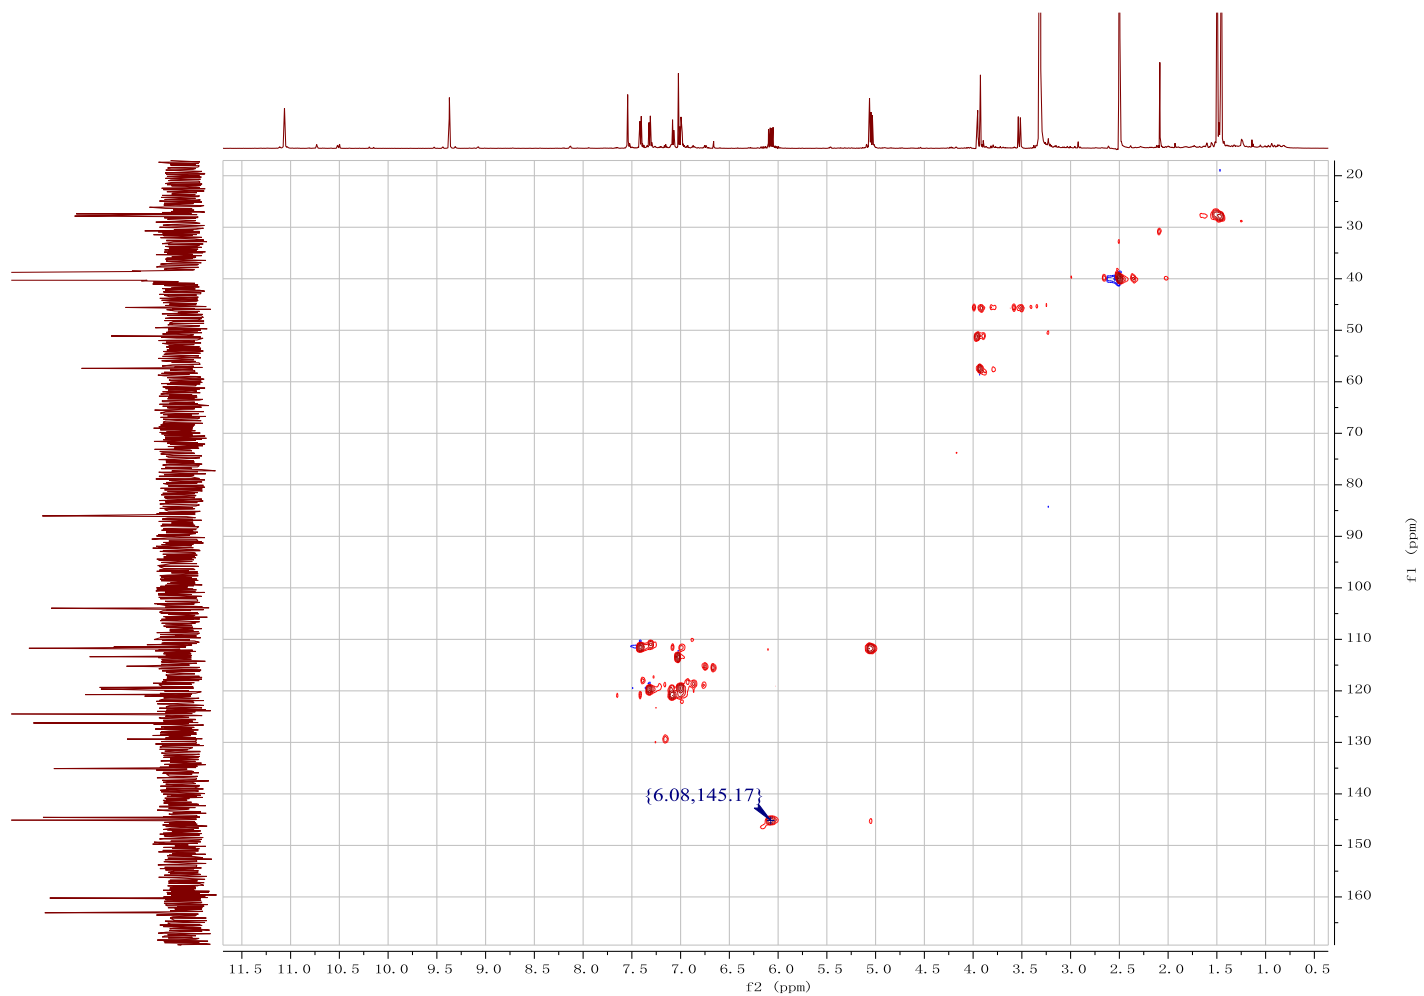

**Figure S3.** HSQC NMR Spectrum of compounds ( $\pm$ )-1 in  $\text{DMSO-}d_6$

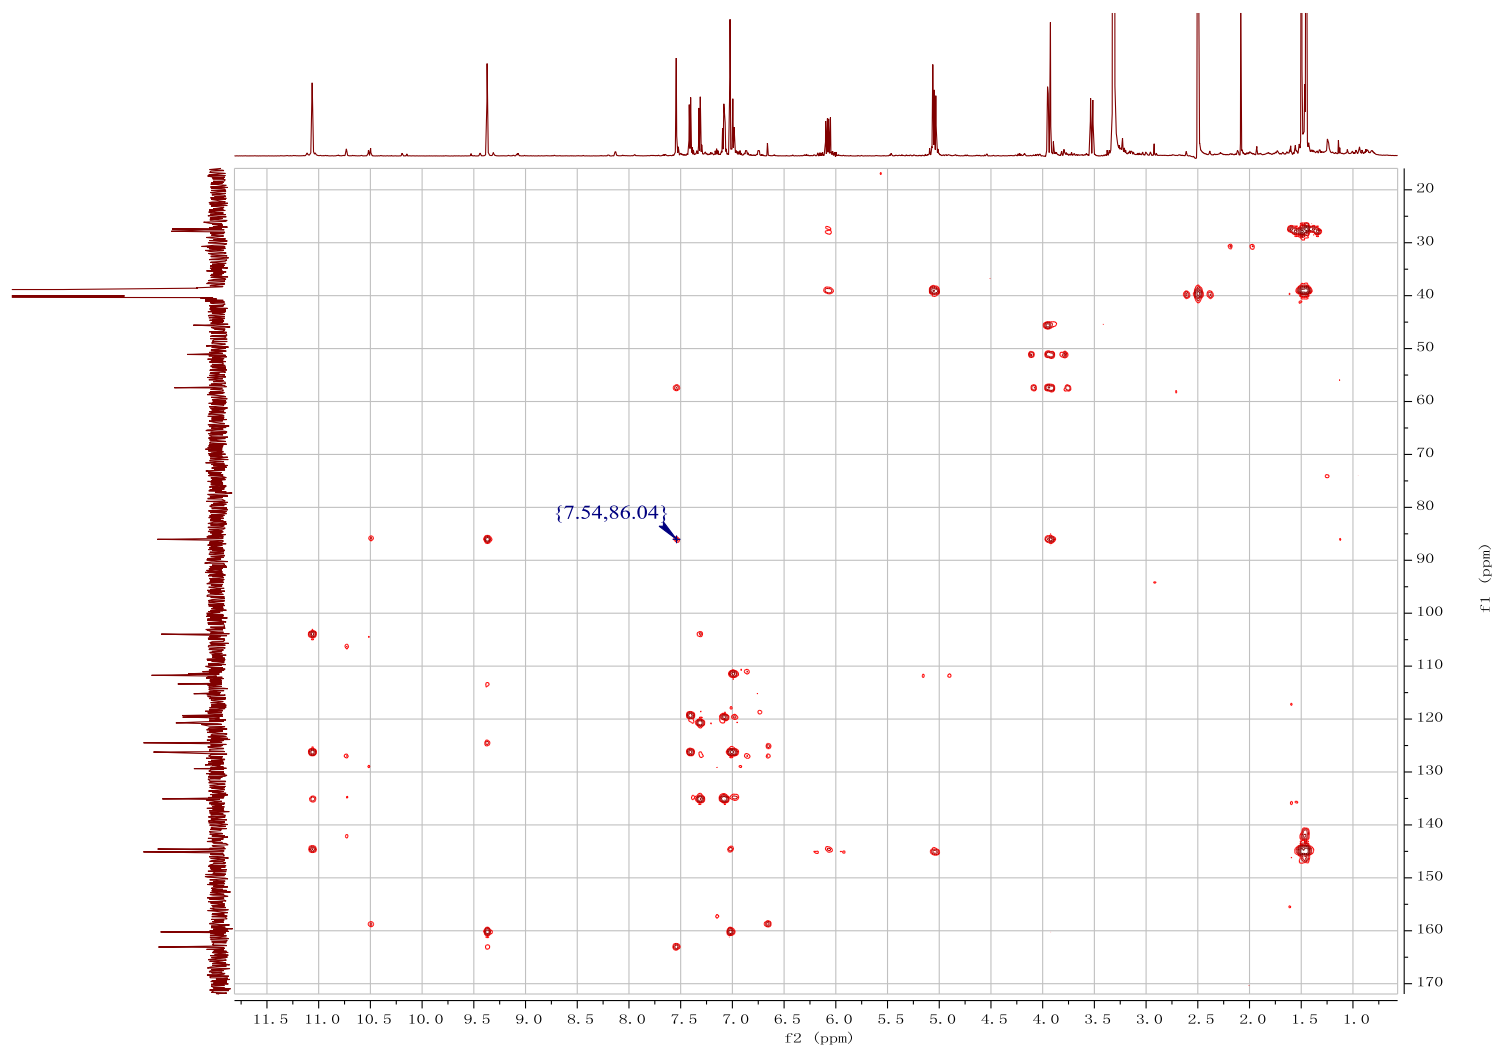

**Figure S4.** HMBC NMR Spectrum of compounds (±)-**1** in DMSO-*d*<sub>6</sub>

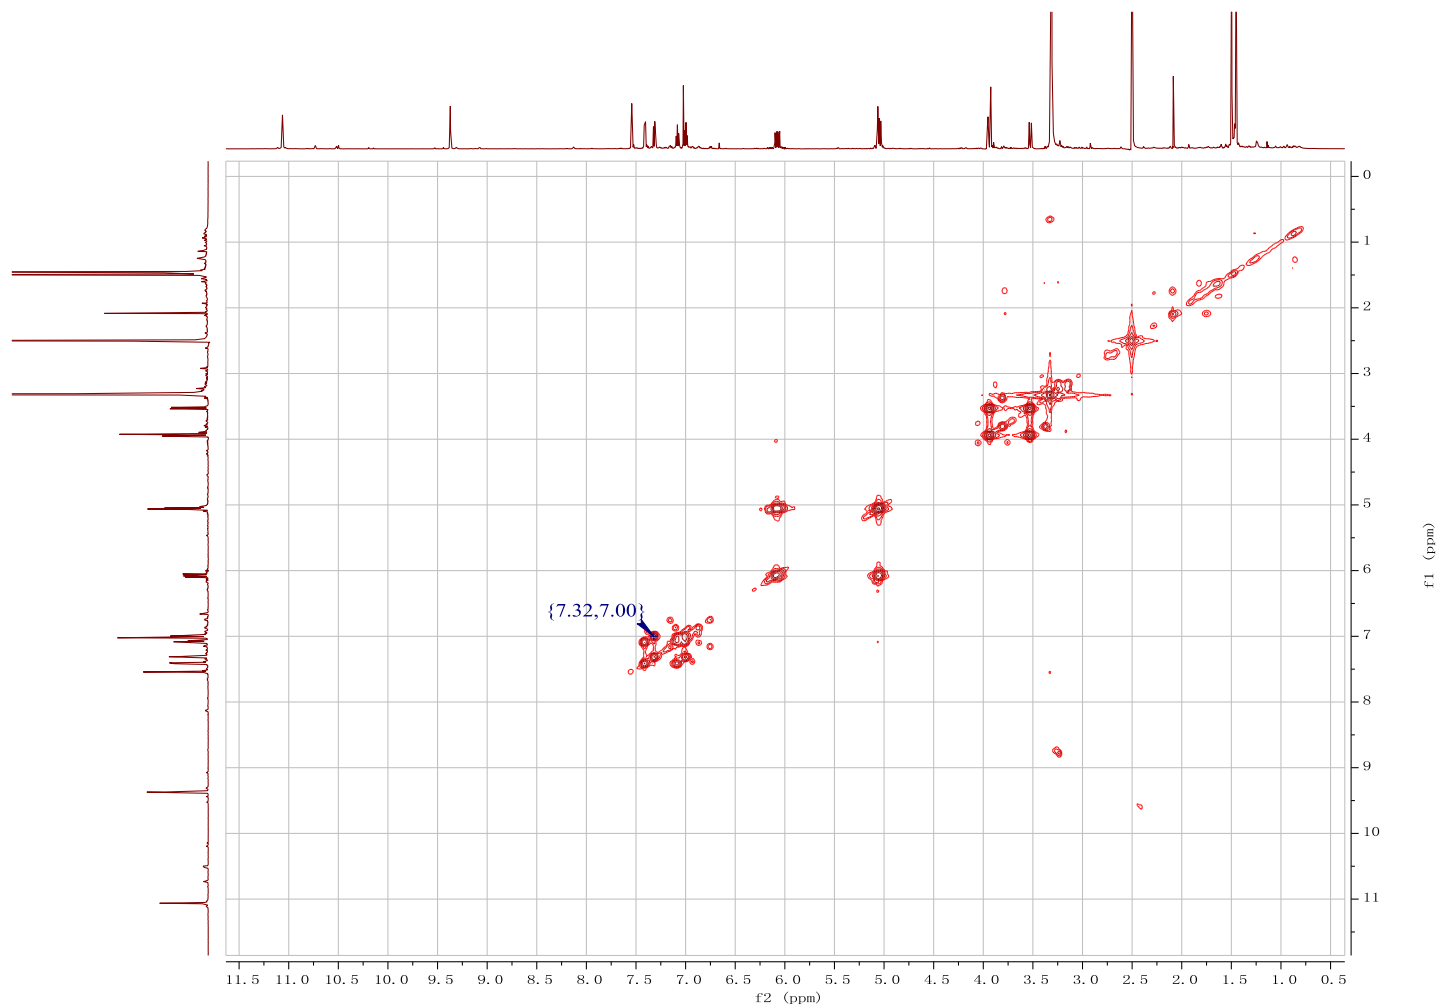

**Figure S5.**  $^1\text{H}$ - $^1\text{H}$  COSY NMR Spectrum of compounds ( $\pm$ )-**1** in  $\text{DMSO-}d_6$

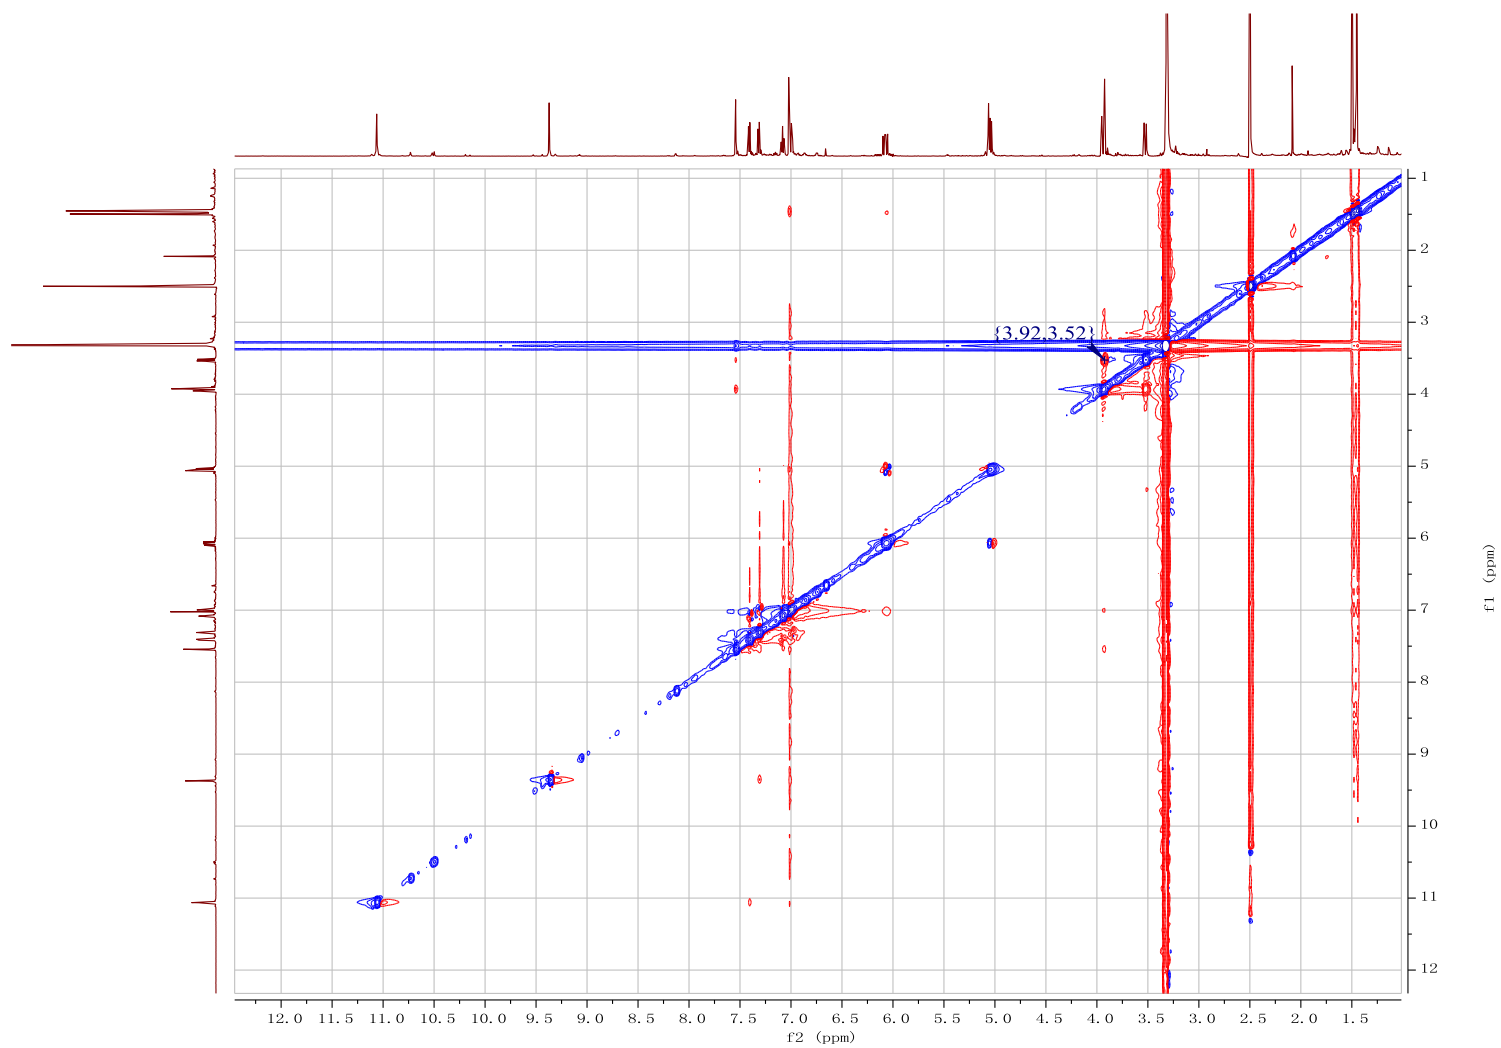

**Figure S6.** ROESY NMR Spectrum of compounds ( $\pm$ )-**1** in DMSO- $d_6$



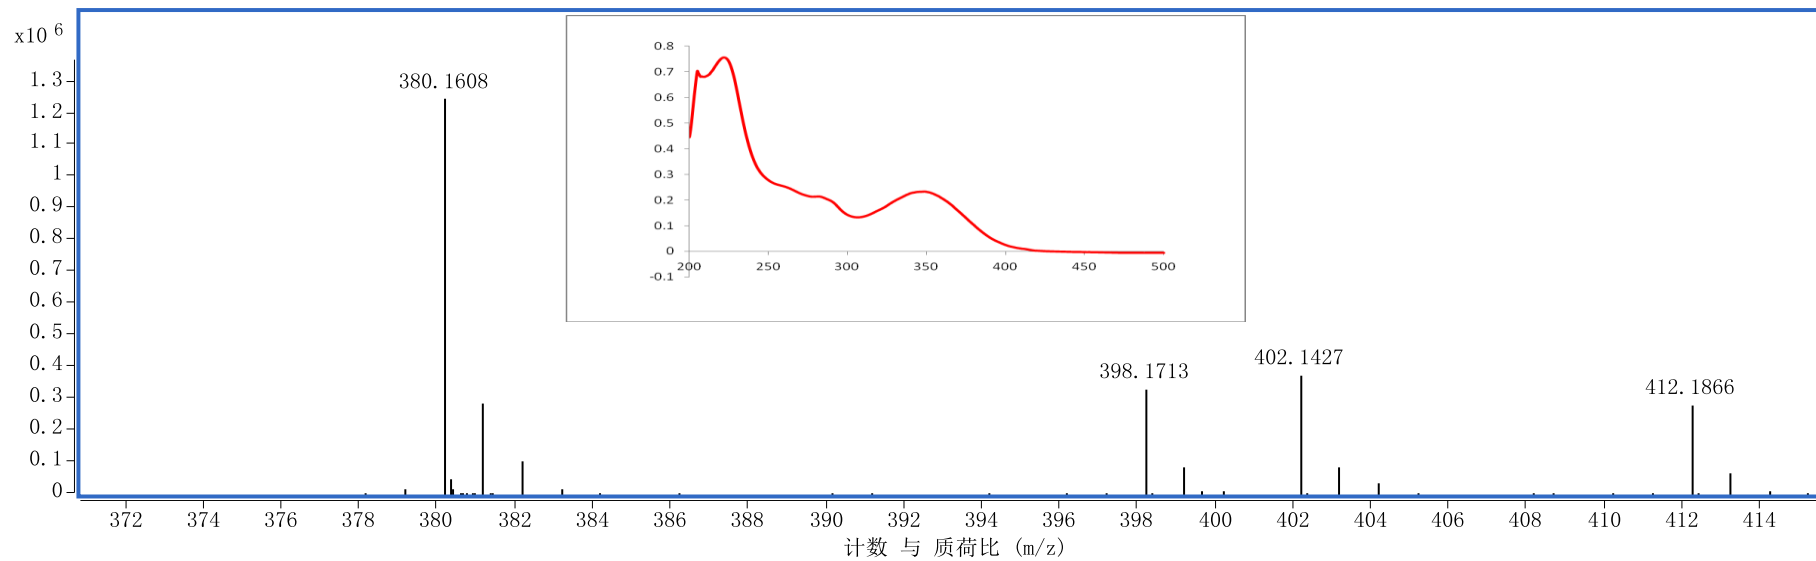

**Figure S7.** HRESIMS and UV spectrum of compounds (±)-1 in CH<sub>3</sub>OH

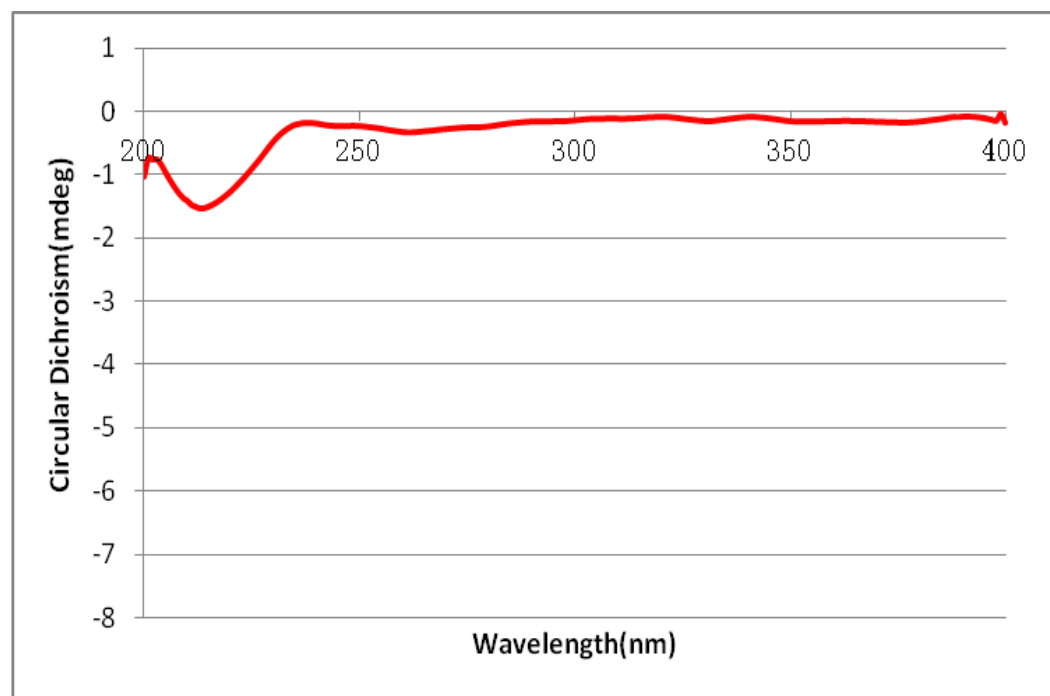

**Figure S8.** Circular Dichroism spectrum of compounds (±)-**1** in CH<sub>3</sub>OH

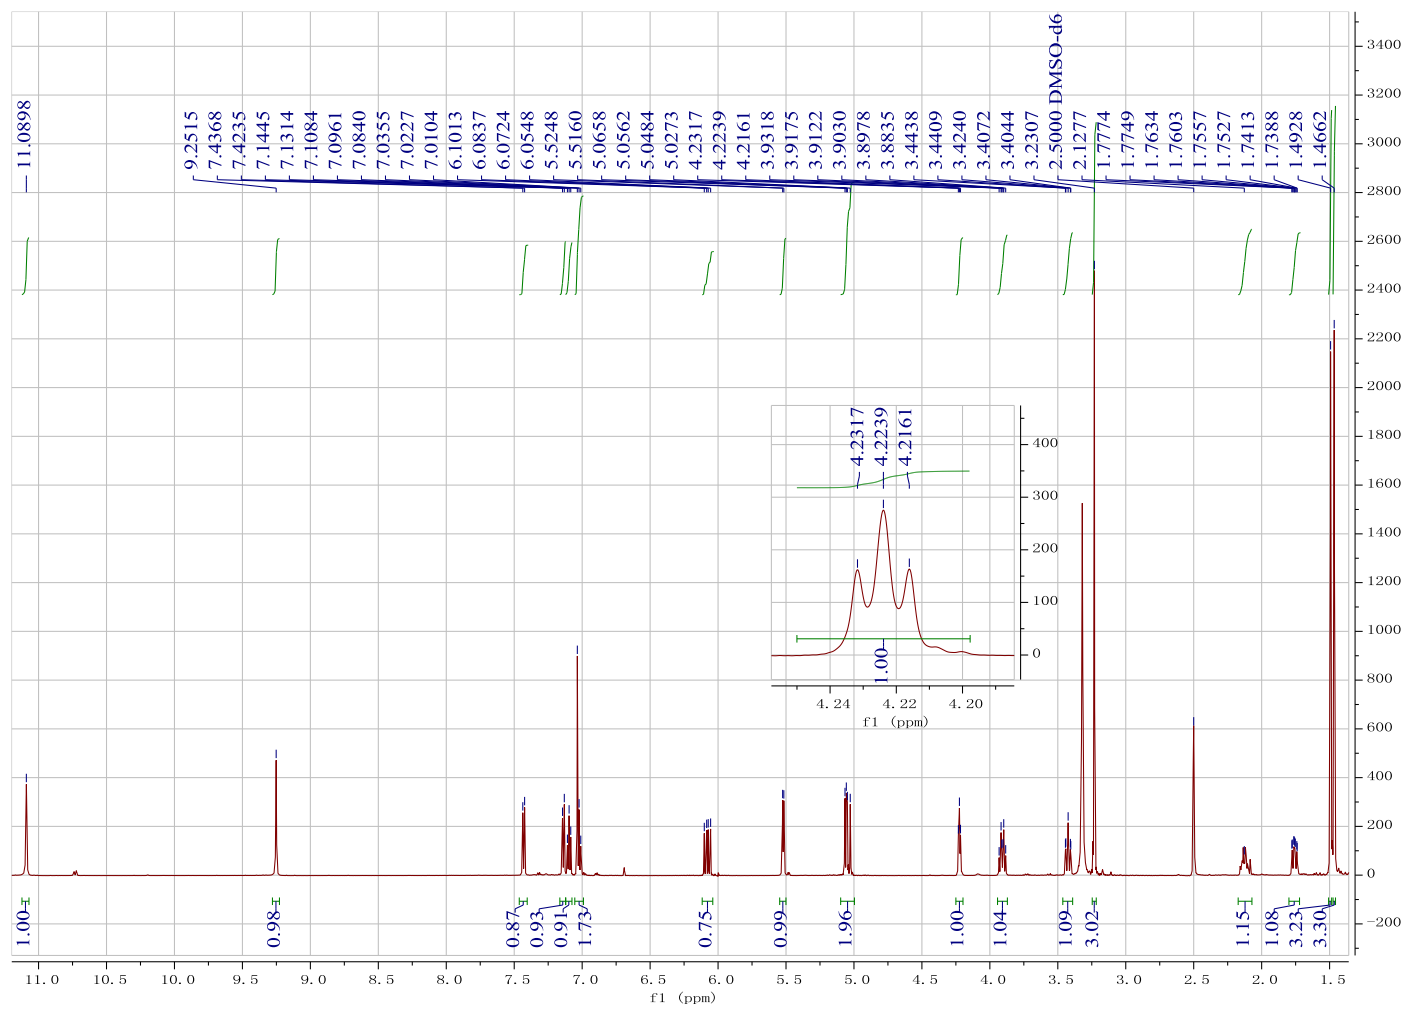

Figure S9. <sup>1</sup>H NMR Spectrum of compounds (±)-2 in DMSO-*d*<sub>6</sub> at 600 MHz

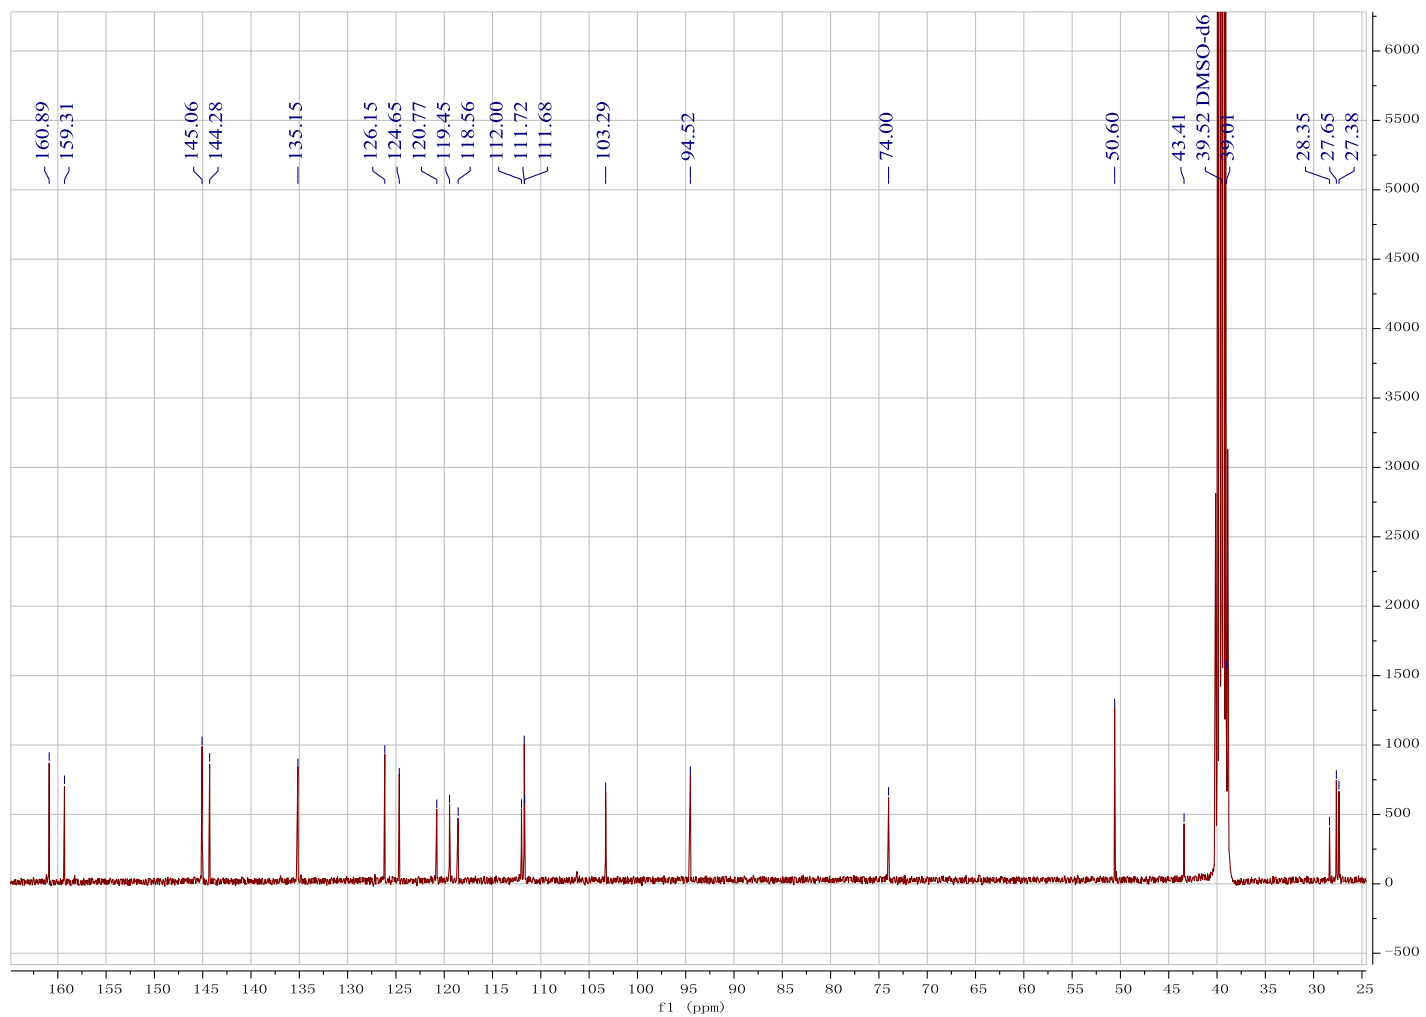

**Figure S10.**  $^{13}\text{C}$  NMR Spectrum of compounds ( $\pm$ )-**2** in  $\text{DMSO-}d_6$  at 600 MHz

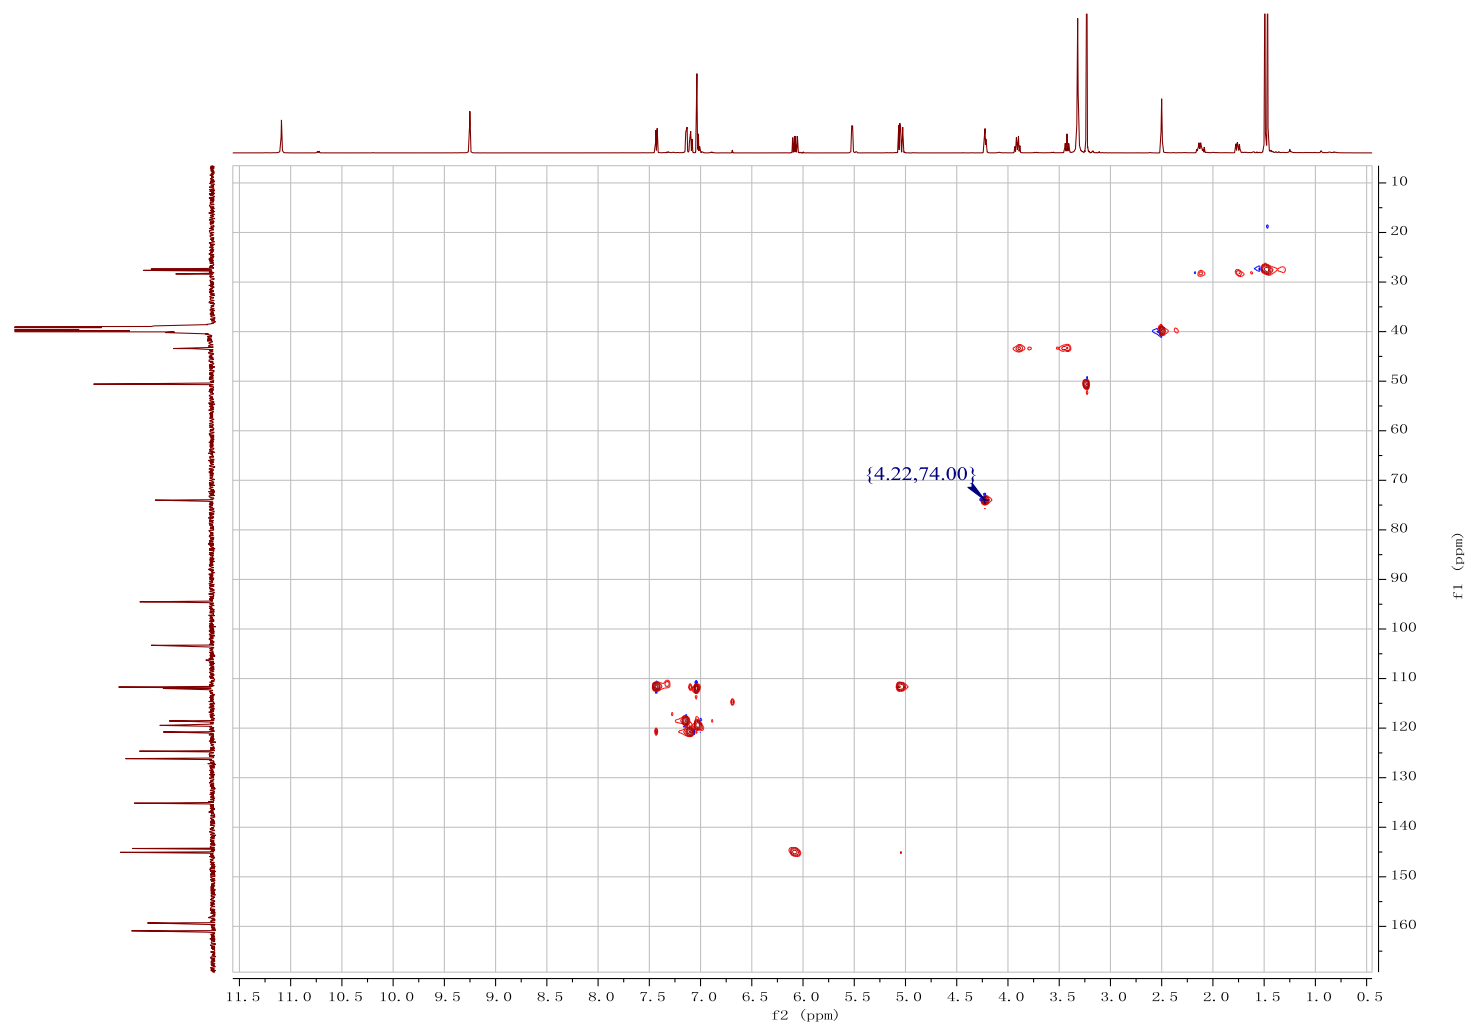

**Figure S11.** HSQC NMR Spectrum of compounds (±)-**2** in DMSO-*d*<sub>6</sub> at 600 MHz

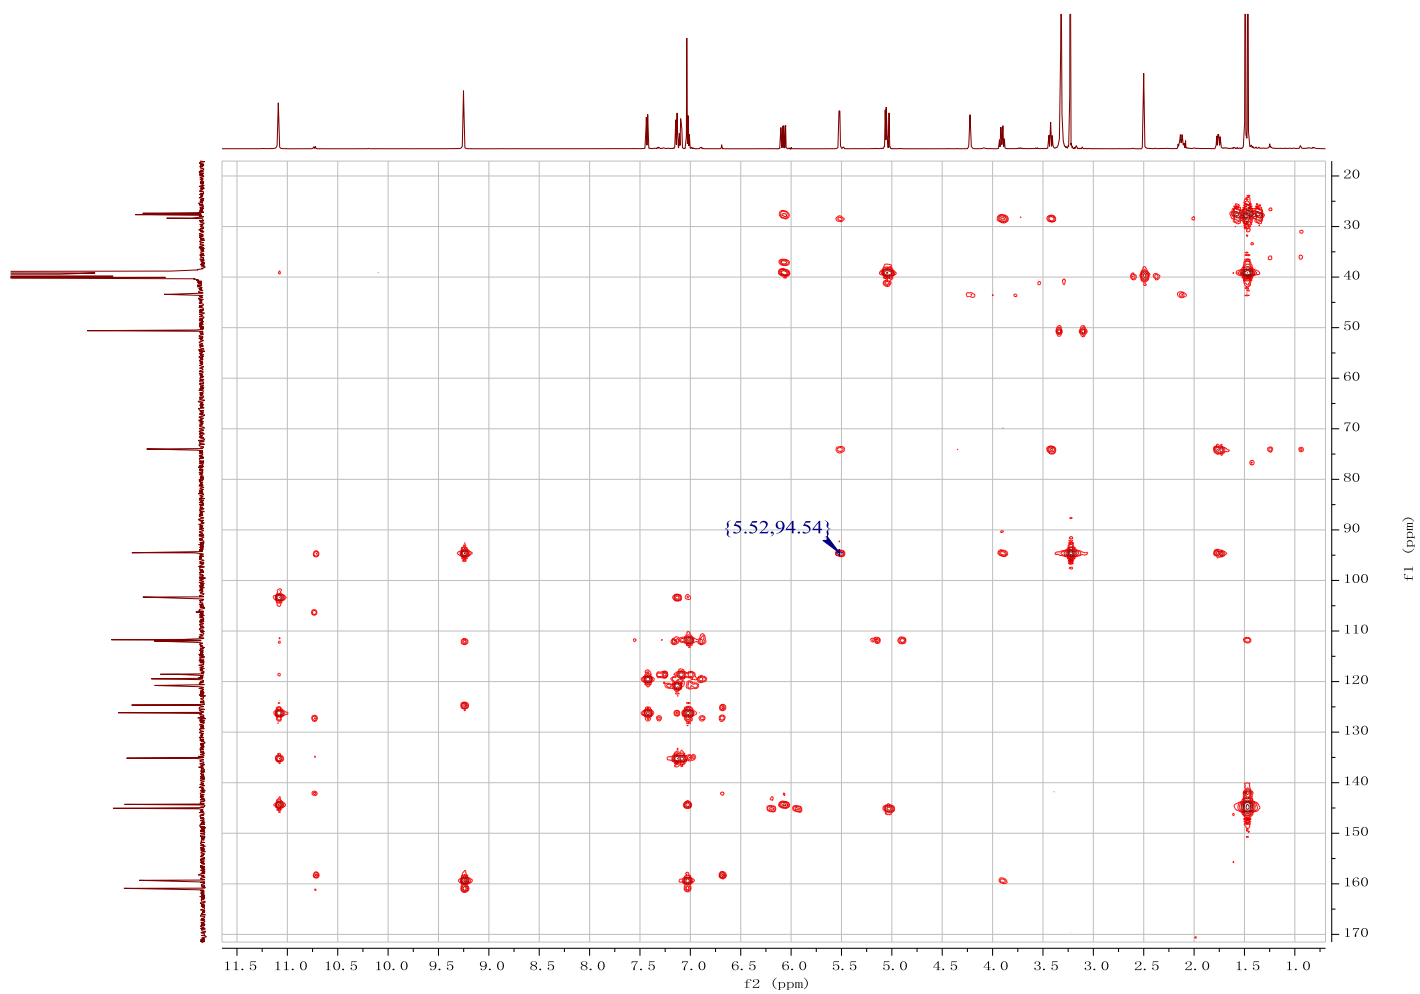

**Figure S12.** HMBC NMR Spectrum of compounds ( $\pm$ )-**2** in DMSO- $d_6$  at 600 MHz

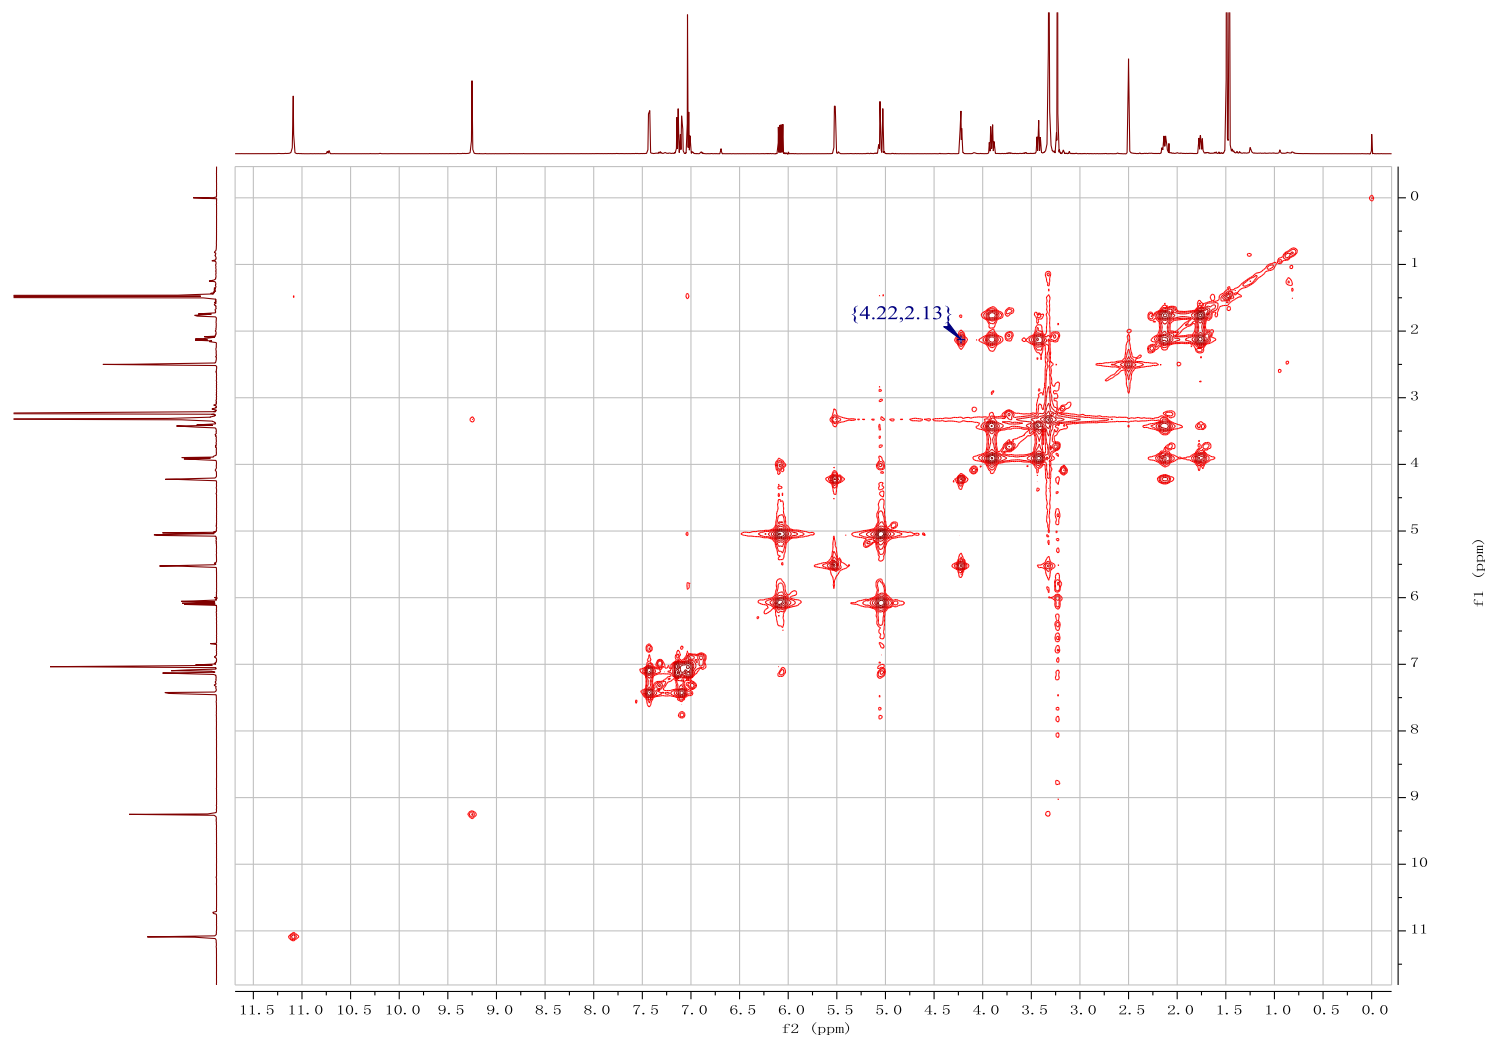

**Figure S13.** <sup>1</sup>H-<sup>1</sup>H COSY NMR Spectrum of compounds (±)-**2** in DMSO-*d*<sub>6</sub>

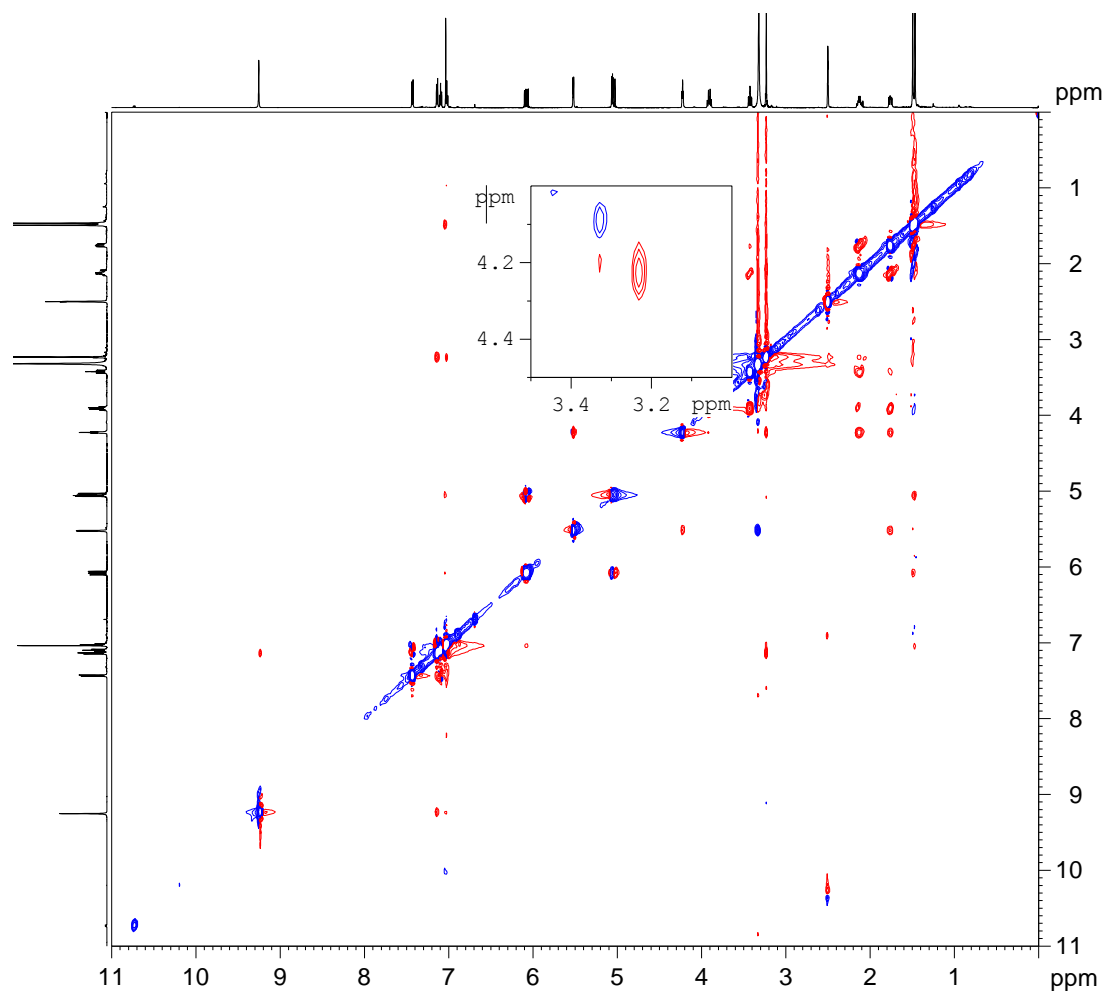

**Figure S14.** ROESY NMR Spectrum of compounds ( $\pm$ )-2 in DMSO- $d_6$



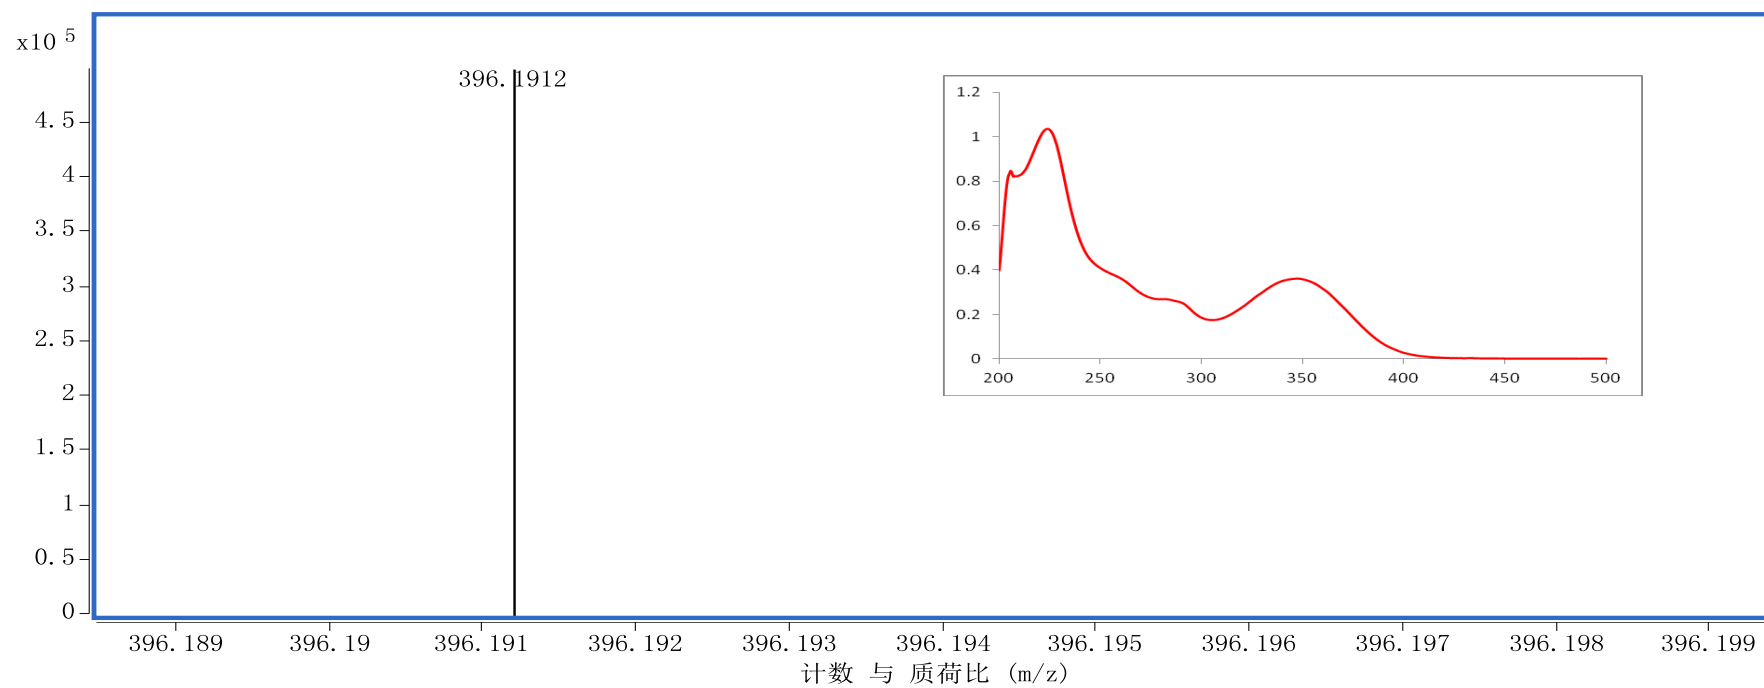

**Figure S15.** HRESIMS and UV spectrum of compounds (±)-2 in CH<sub>3</sub>OH

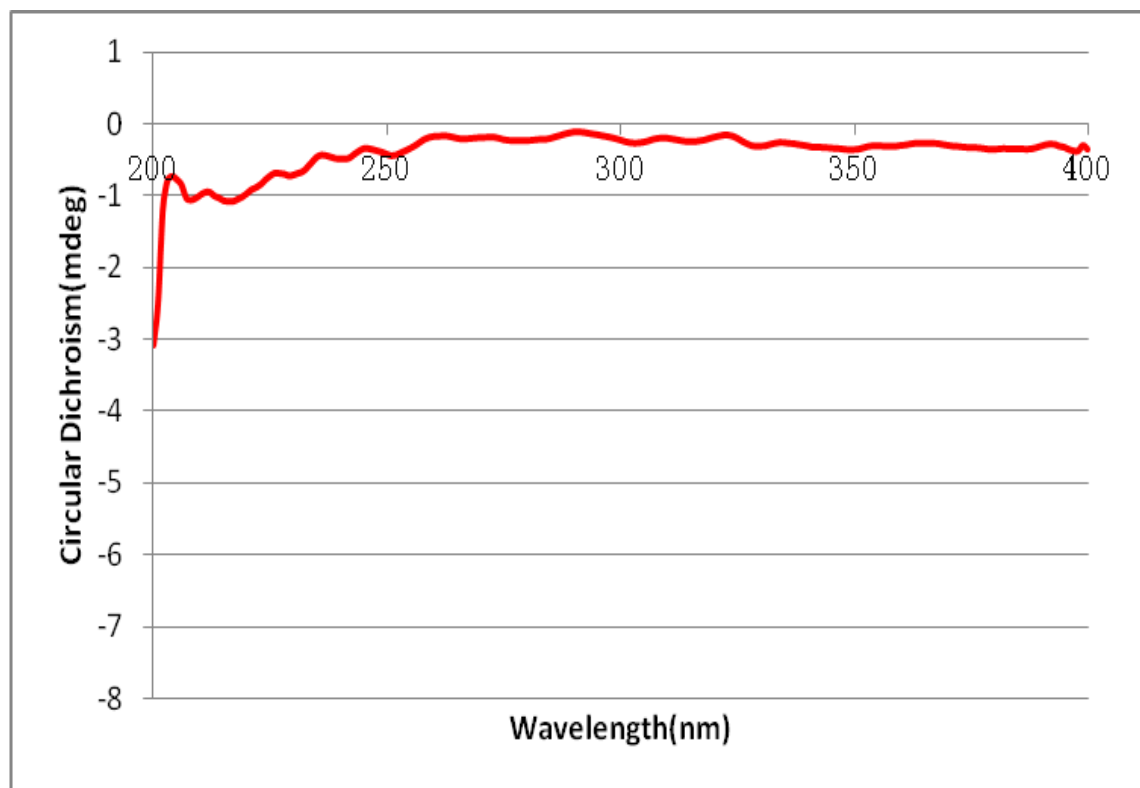

**Figure S16.** Circular Dichroism spectrum of compounds (±)-2 in CH<sub>3</sub>OH

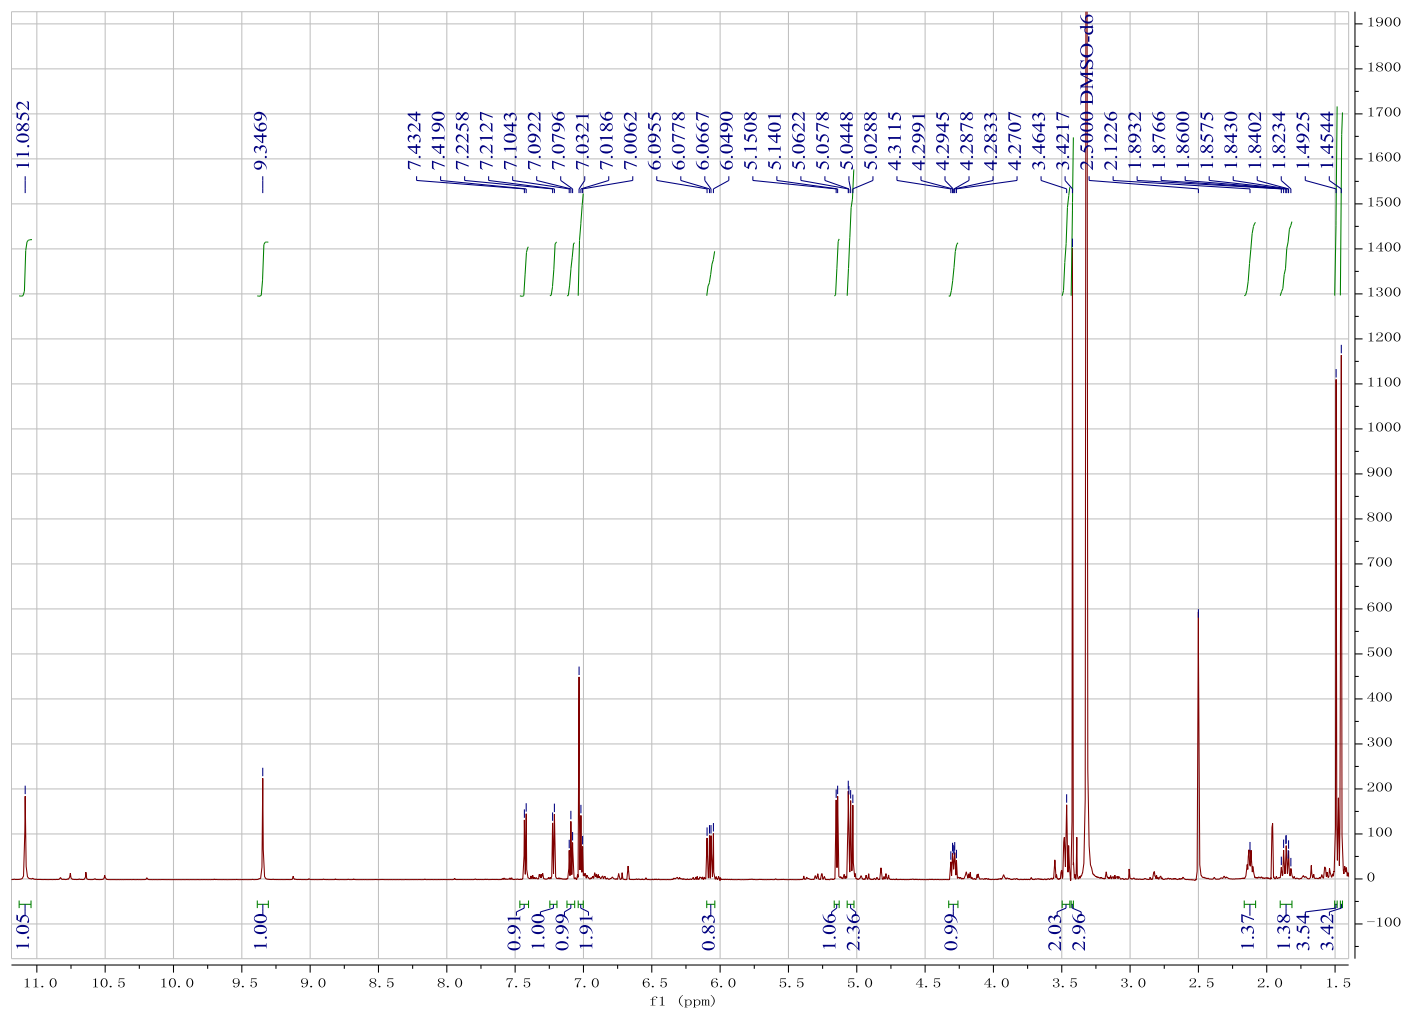

**Figure S17.**  $^1\text{H}$  NMR Spectrum of compounds ( $\pm$ )-**3** in  $\text{DMSO-}d_6$  at 600 MHz

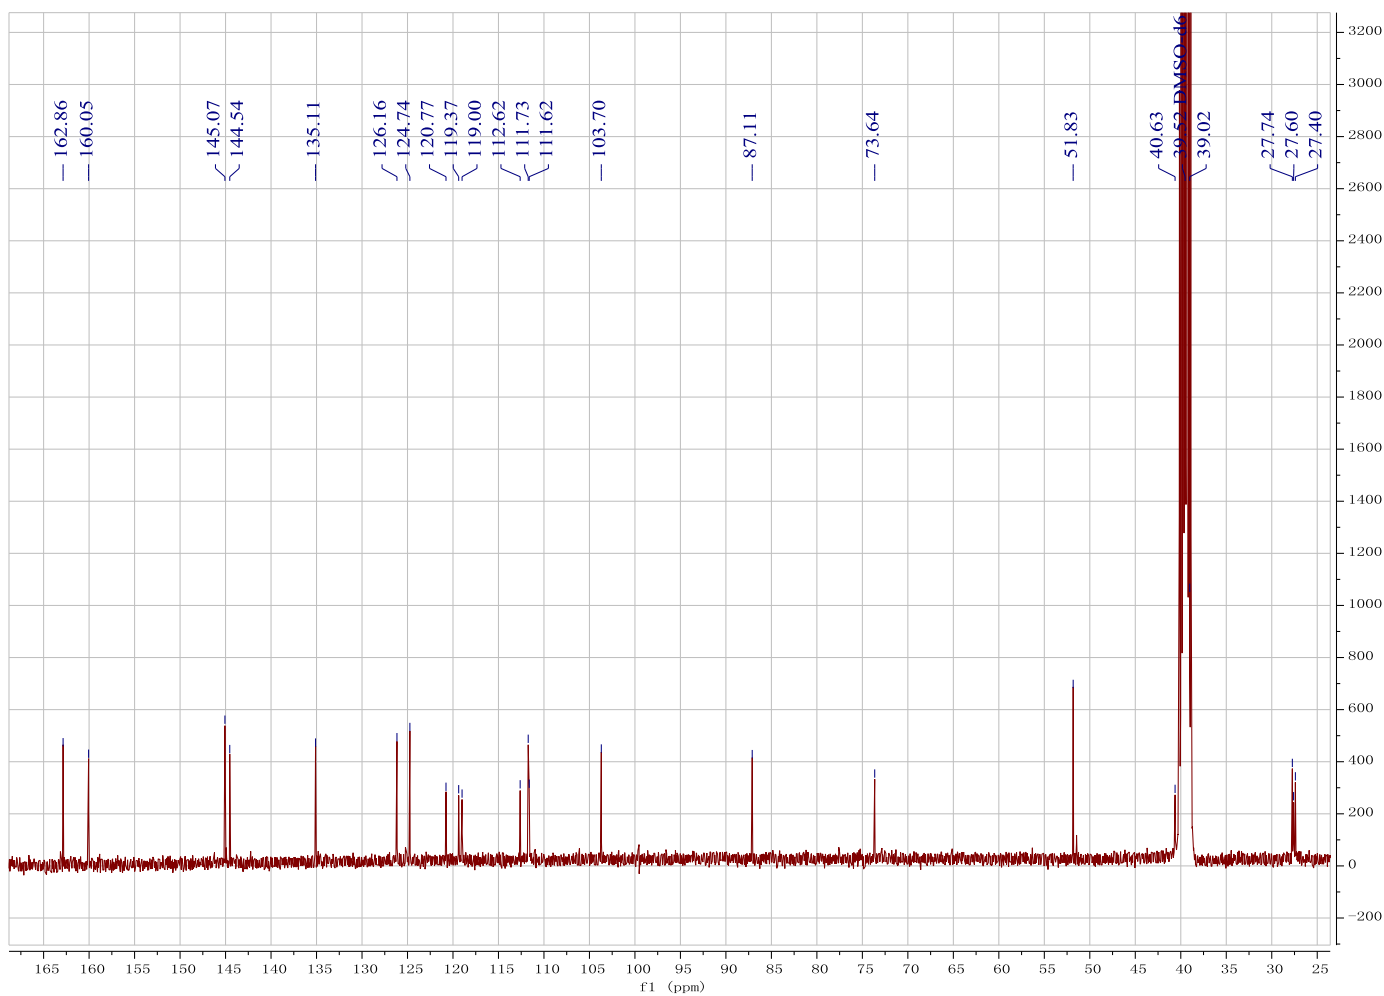

**Figure S18.** <sup>13</sup>C NMR Spectrum of compounds (±)-3 in DMSO-*d*<sub>6</sub> at 600 MHz

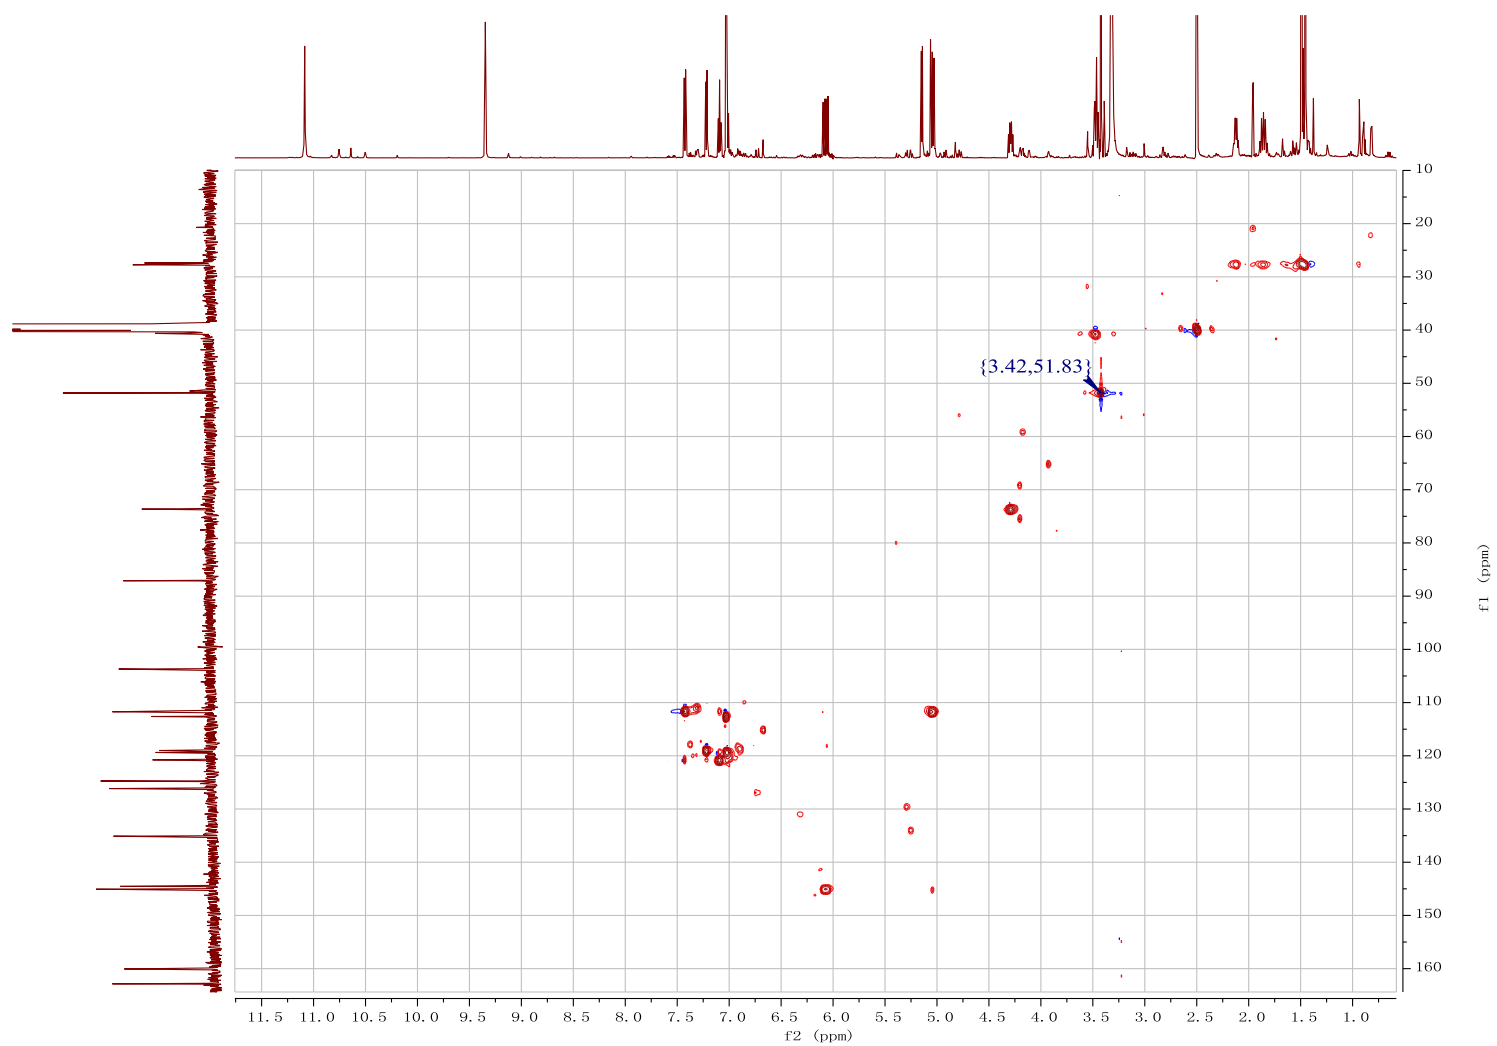

**Figure S19.** HSQC NMR Spectrum of compounds (±)-**3** in DMSO-*d*<sub>6</sub>

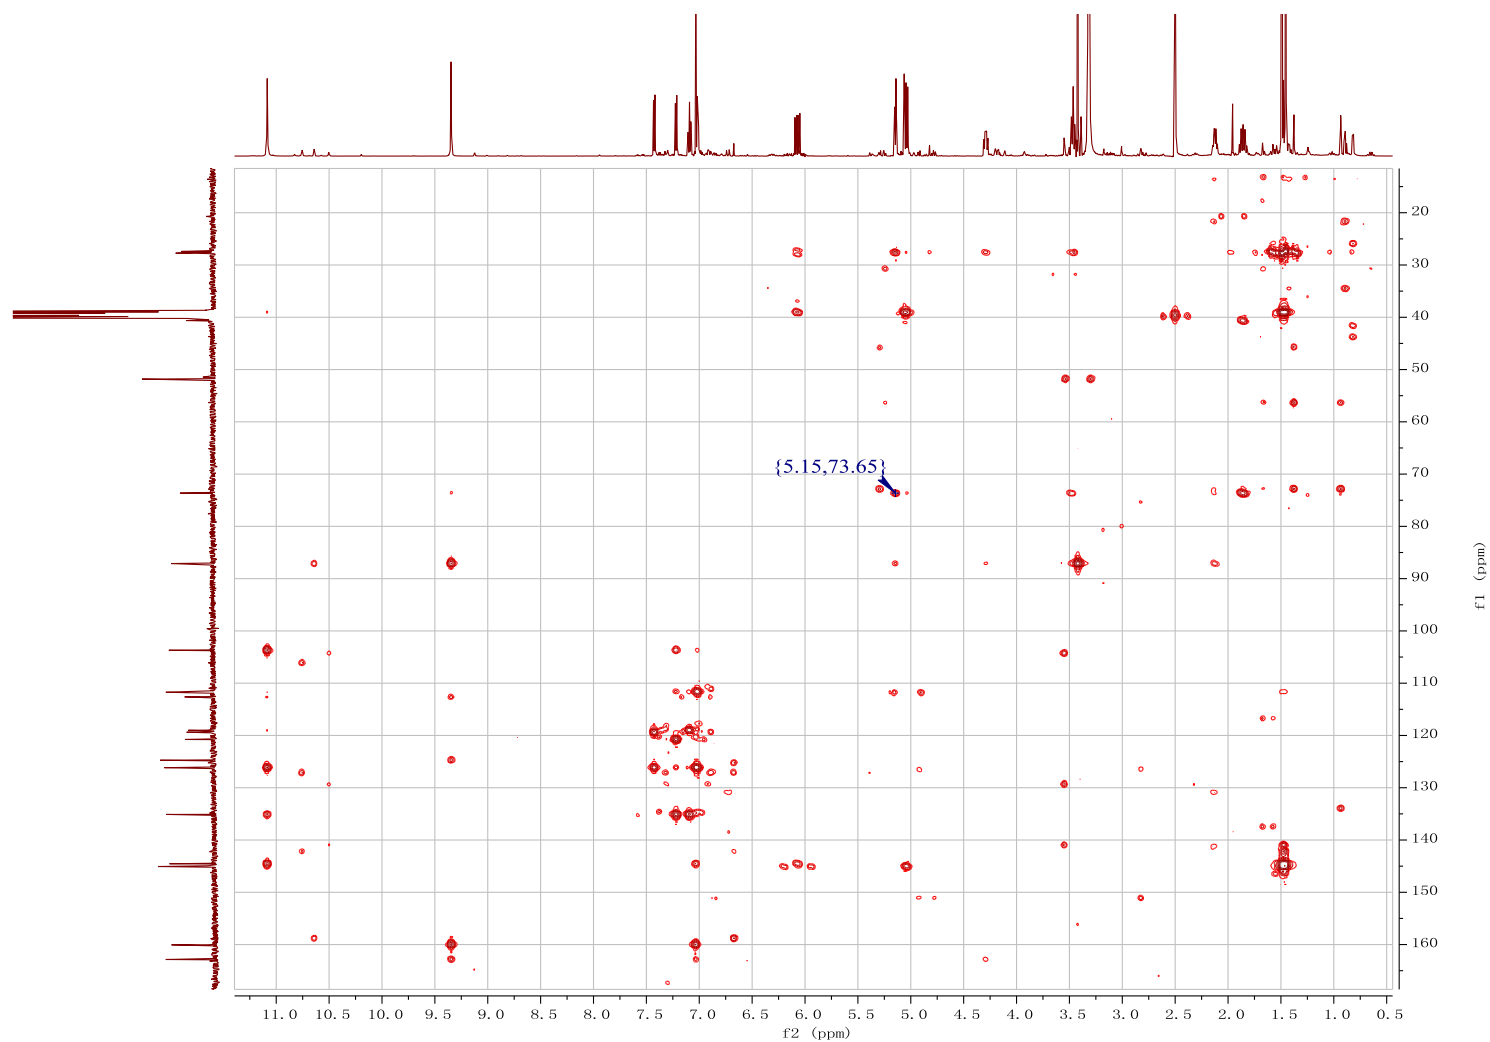

**Figure S20.** HMBC NMR Spectrum of compounds (±)-**3** in DMSO-*d*<sub>6</sub>

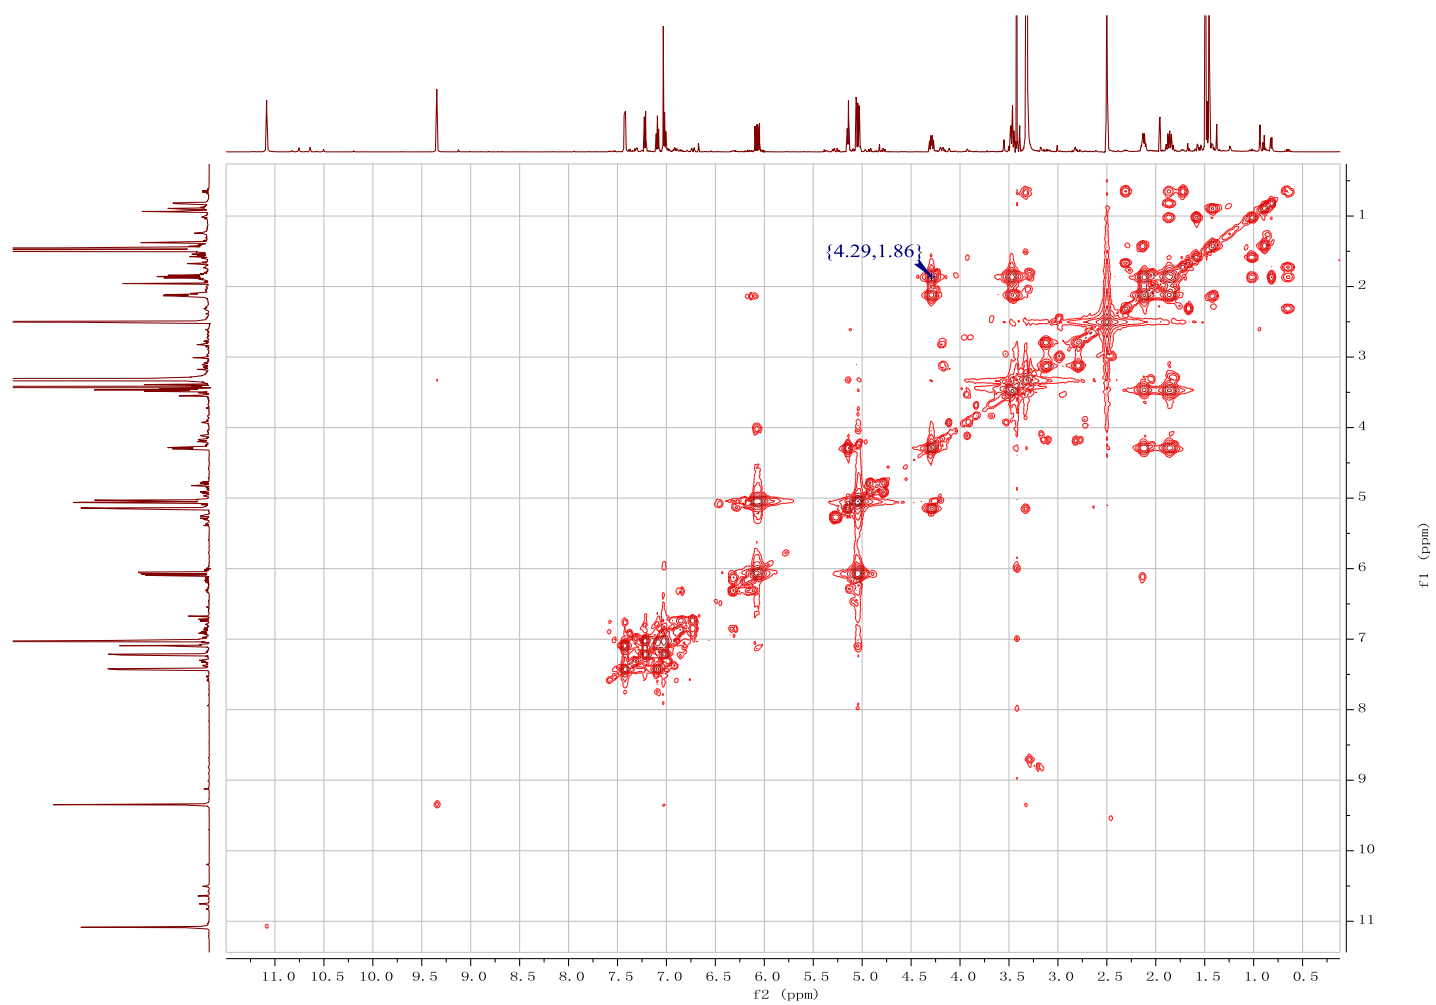

**Figure S21.**  $^1\text{H}$ - $^1\text{H}$  COSY NMR Spectrum of compounds ( $\pm$ )-**3** in  $\text{DMSO-}d_6$

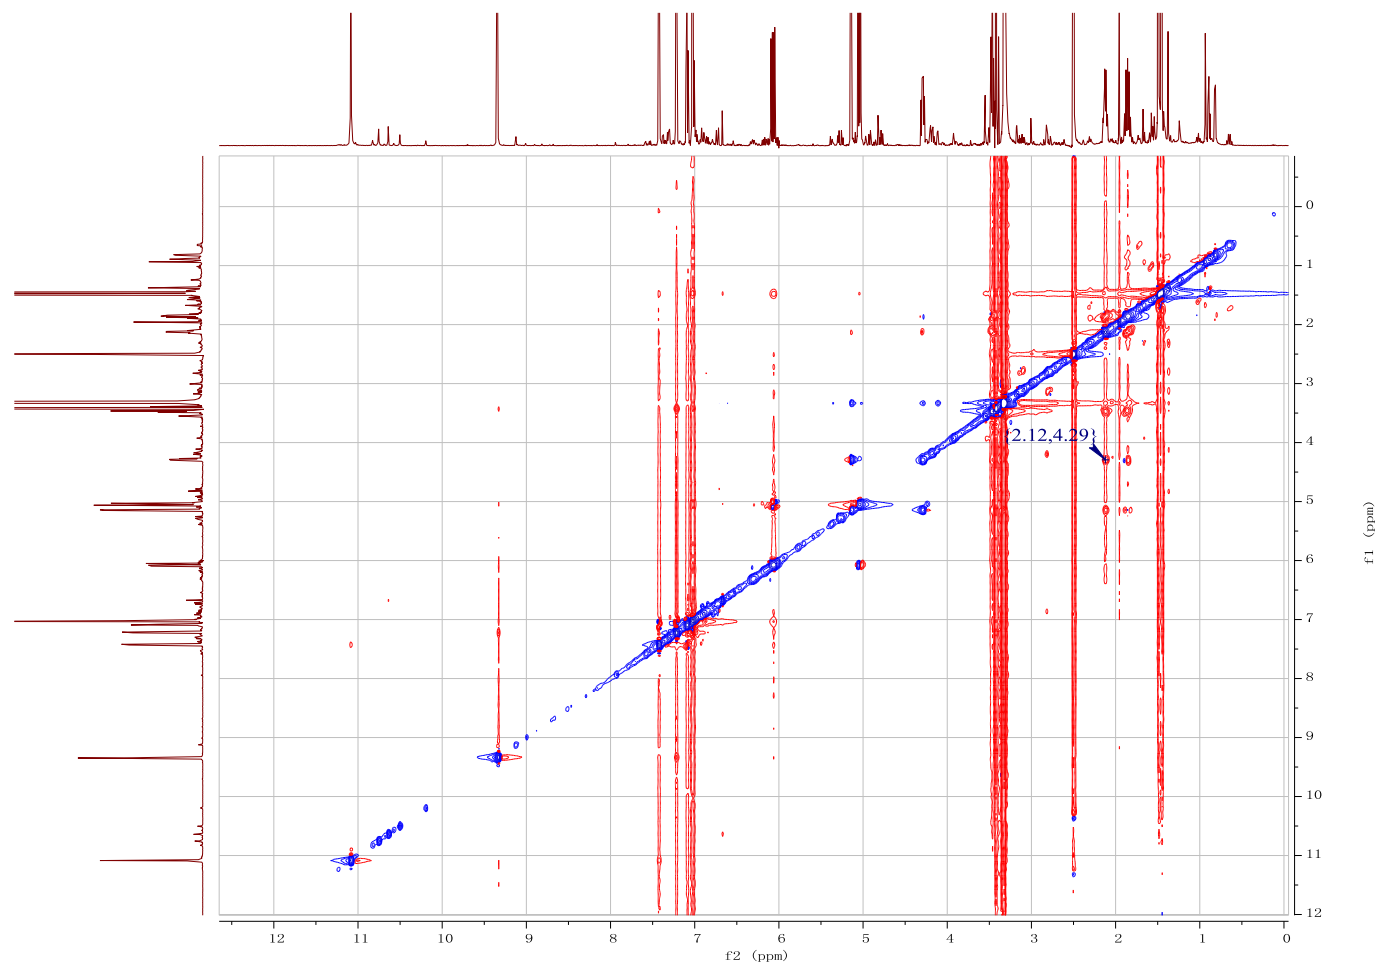

**Figure S22.** ROESY NMR Spectrum of compounds (±)-**3** in DMSO-*d*<sub>6</sub>



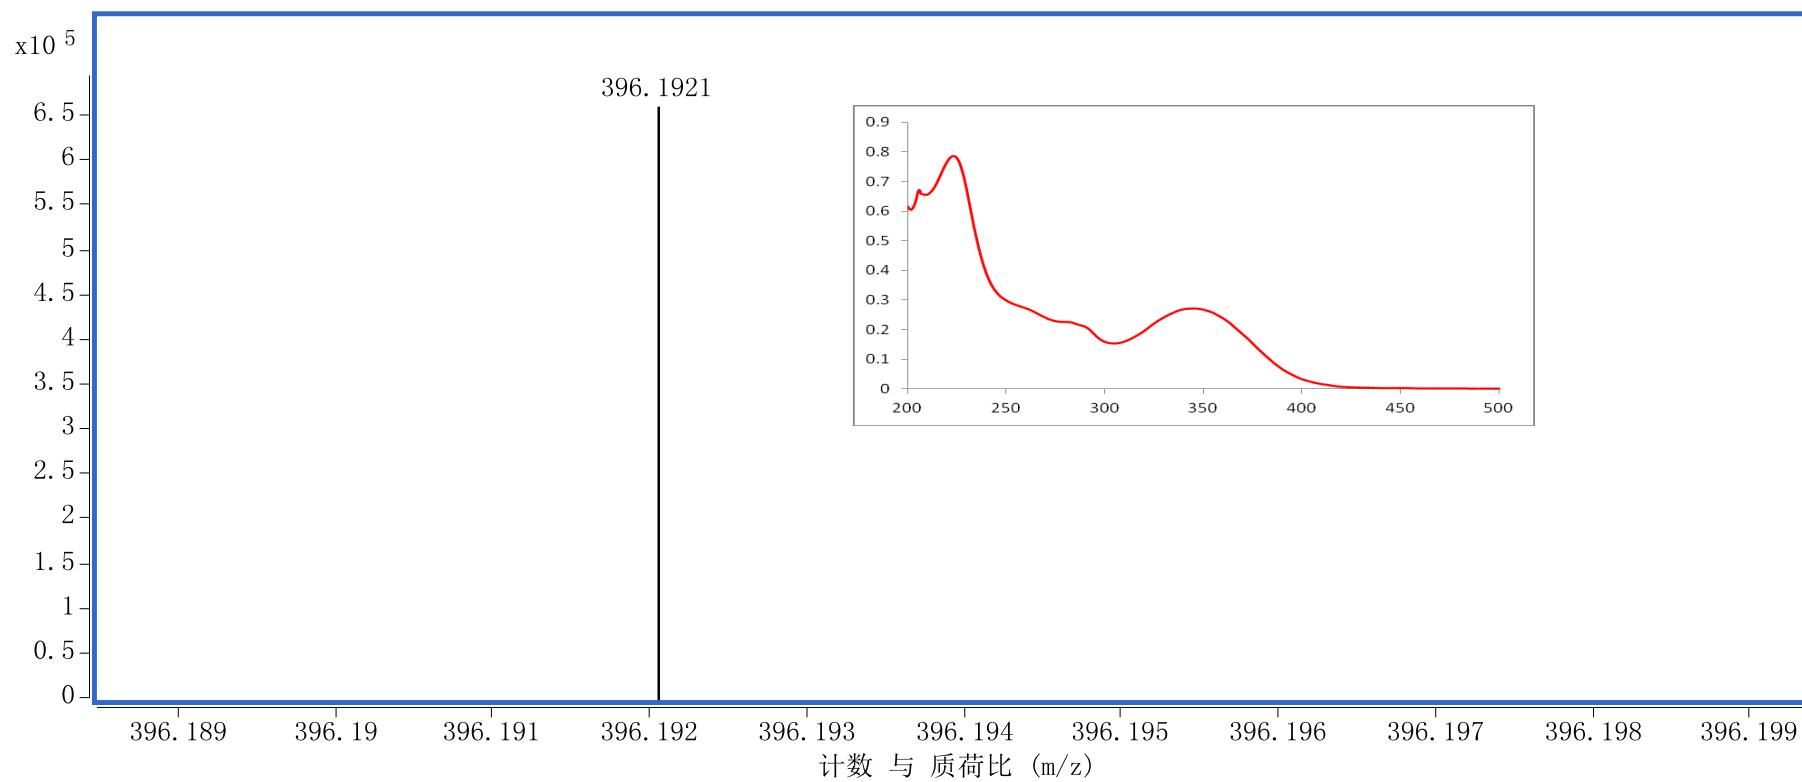

**Figure S23.** HRESIMS and UV spectrum of compounds (±)-**3** in CH<sub>3</sub>OH

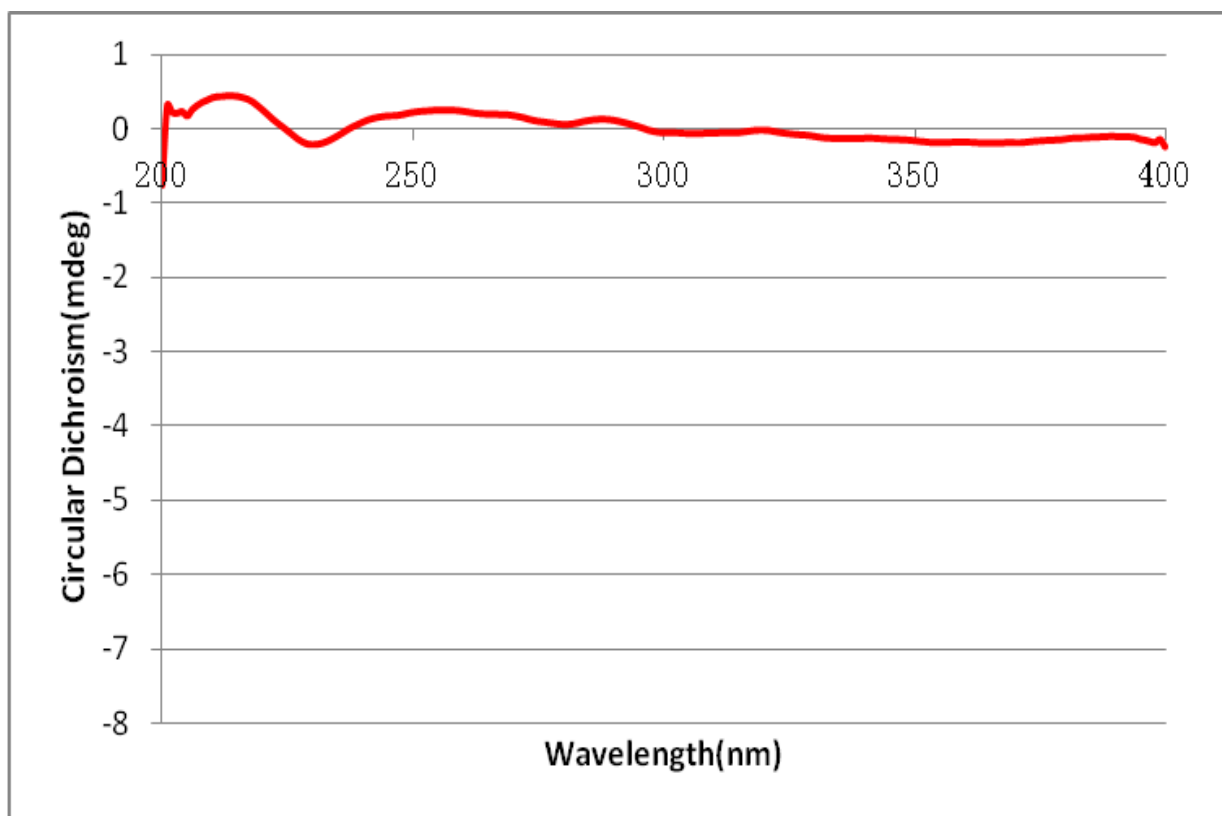

**Figure S24.** Circular Dichroism spectrum of compounds (±)-**3** in CH<sub>3</sub>OH
